# Supplementary material for: A Novel Piggyback Strategy for mRNA Delivery Exploiting Adenovirus Entry Biology
Source: MDPI journal article supplement (doi:10.3390/v14102169), 2022-09-30
Supplement: s1 [file s1]

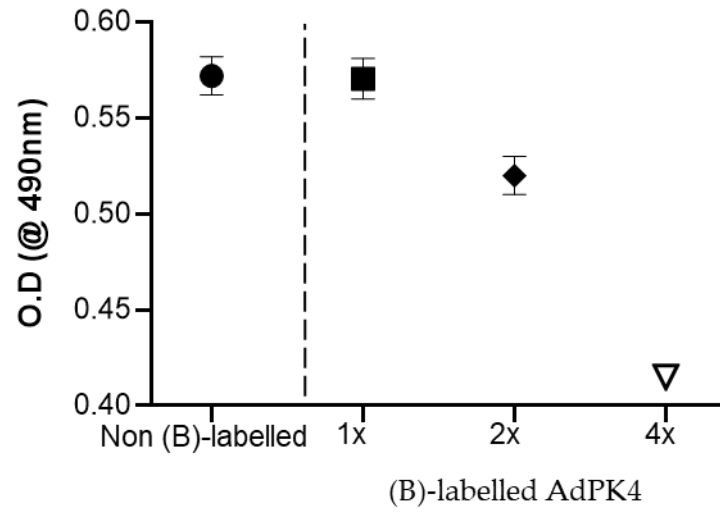

**Figure S1. Validation of AdPK4-STAVpLys-mRNA complexes.** Verification of biotinylation of AdPK4.CMV.GFP was determined through HABA assay by measuring absorbance with different amounts of virus (1x, 2x and 4x) at A490-500 nm. The non-biotinylated adenovirus was also assessed as a control. 1X, 2X, and 4X correspond to  $1 \times 10^{10}$ ,  $2 \times 10^{10}$ , and  $4 \times 10^{10}$  viral particles, respectively.
